# Supplementary material for: One-pot, mouldable, thermoplastic resins from poly(propylene carbonate) and poly(caprolactone triol)
Source: Royal Society of Chemistry journal article supplement (doi:10.1039/c6ra07191k), 2016-01-01
Supplement: c6ra07191k1.pdf [file c6ra07191k1.pdf]

**Supplementary Material:**

**Table S1:** <sup>1</sup>H NMR peak integrals and percentage of –OH terminal groups in PCLT and PCLT-diacid pre-polymers

| Material              | H <sup>a</sup> (δ = 4.0 ppm) | H <sup>a'</sup> (δ = 3.6 ppm) | Terminal –OH groups (%) |
|-----------------------|------------------------------|-------------------------------|-------------------------|
| PCLT                  | 9.8                          | 3.6                           | 27.0                    |
| Pre-polymer PCLT-Seb1 | 10.4                         | 1.9                           | 15.2                    |
| Pre-polymer PCLT-Suc1 | 11.5                         | 1.6                           | 12.0                    |
| Pre-polymer PCLT-Seb3 | 9.6                          | 0.2                           | 1.9                     |
| Pre-polymer PCLT-Suc3 | 13.7                         | 0.3                           | 2.4                     |

**Table S2:** <sup>1</sup>H NMR peak integrals and percentage of –OH terminal groups in PPC and PPC-PCLT co-polymers

| Material | H <sup>b</sup> (δ = 5.0 ppm) | H <sup>d</sup> (δ = 4.9 ppm) | Terminal –OH groups (%) |
|----------|------------------------------|------------------------------|-------------------------|
| PPC      | 11.6                         | 1.5                          | 11.8                    |
| CP-Seb1  | 11.8                         | 1.2                          | 9.0                     |
| CP-Suc1  | 11.2                         | 1.1                          | 8.9                     |
| CP-Seb3  | 11.0                         | 1.0                          | 8.6                     |
| CP-Suc3  | 12.0                         | 1.0                          | 8.0                     |

**Table S3:** Tensile and recovery data of pure PPC and PPC-PCLT co-polymers

| Material             | Young's modulus (MPa) | Yield strength (MPa) | Tensile strength (MPa) | Elongation at break (%) | Permanent deformation (%) |
|----------------------|-----------------------|----------------------|------------------------|-------------------------|---------------------------|
| PPC                  | 0.93 ± 0.31           | 0.22 ± 0.08          | 0.22 ± 0.05            | 4260 ± 96               | -0.04 ± 0.02              |
| Co-polymer PCLT-Seb1 | 58.3 ± 6.1            | 1.88 ± 0.34          | 1.85 ± 0.42            | 561 ± 57                | 23.6 ± 1.1                |
| Co-polymer PCLT-Suc1 | 55.8 ± 4.7            | 1.46 ± 0.57          | 1.93 ± 0.29            | 1290 ± 85               | 17.6 ± 0.9                |
| Co-polymer PCLT-Seb3 | 23.8 ± 3.2            | 1.02 ± 0.23          | 1.16 ± 0.33            | 1408 ± 63               | 21.7 ± 1.3                |
| Co-polymer PCLT-Suc3 | 28.3 ± 4.4            | 1.27 ± 0.20          | 1.43 ± 0.10            | 702 ± 49                | 19.8 ± 0.9                |

**Table S4:** Thermal transitions of PPC and PPC-PCLT co-polymers

| <b>Material</b>      | <b>T<sub>g</sub> (PPC)</b> | <b>T<sub>δ</sub> (PPC)</b> | <b>T<sub>γ</sub> (PPC)</b> | <b>T<sub>β</sub> (PPC)</b> | <b>T<sub>g</sub> (PCLT)</b> | <b>T<sub>m</sub> (PCLT)</b> |
|----------------------|----------------------------|----------------------------|----------------------------|----------------------------|-----------------------------|-----------------------------|
| PPC                  | 37                         | -75                        | -38                        | -28                        | -                           | -                           |
| Co-polymer PCLT-Seb1 | 46                         | -80                        | -35                        | -21                        | -60                         | 9                           |
| Co-polymer PCLT-Suc1 | 41                         | -82                        | -45                        | -26                        | -68                         | 3                           |
| Co-polymer PCLT-Seb3 | 43                         | -87                        | -44                        | -25                        | -50                         | 3                           |
| Co-polymer PCLT-Suc3 | 42                         | -86                        | -38                        | -21                        | -67                         | 6                           |
